# Supplementary material for: Brg1 restrains the pro-inflammatory properties of ILC3s and modulates intestinal immunity
Source: Mucosal Immunol. 2020 Jul 1;14(1):38–52. doi: 10.1038/s41385-020-0317-3 (PMC7790751; doi:10.1038/s41385-020-0317-3)
Supplement: Supplementary file 1 — Supplementary Information [file 41385_2020_317_MOESM1_ESM.pdf]

## Supplementary Information

Qi et. al.

Figure S1

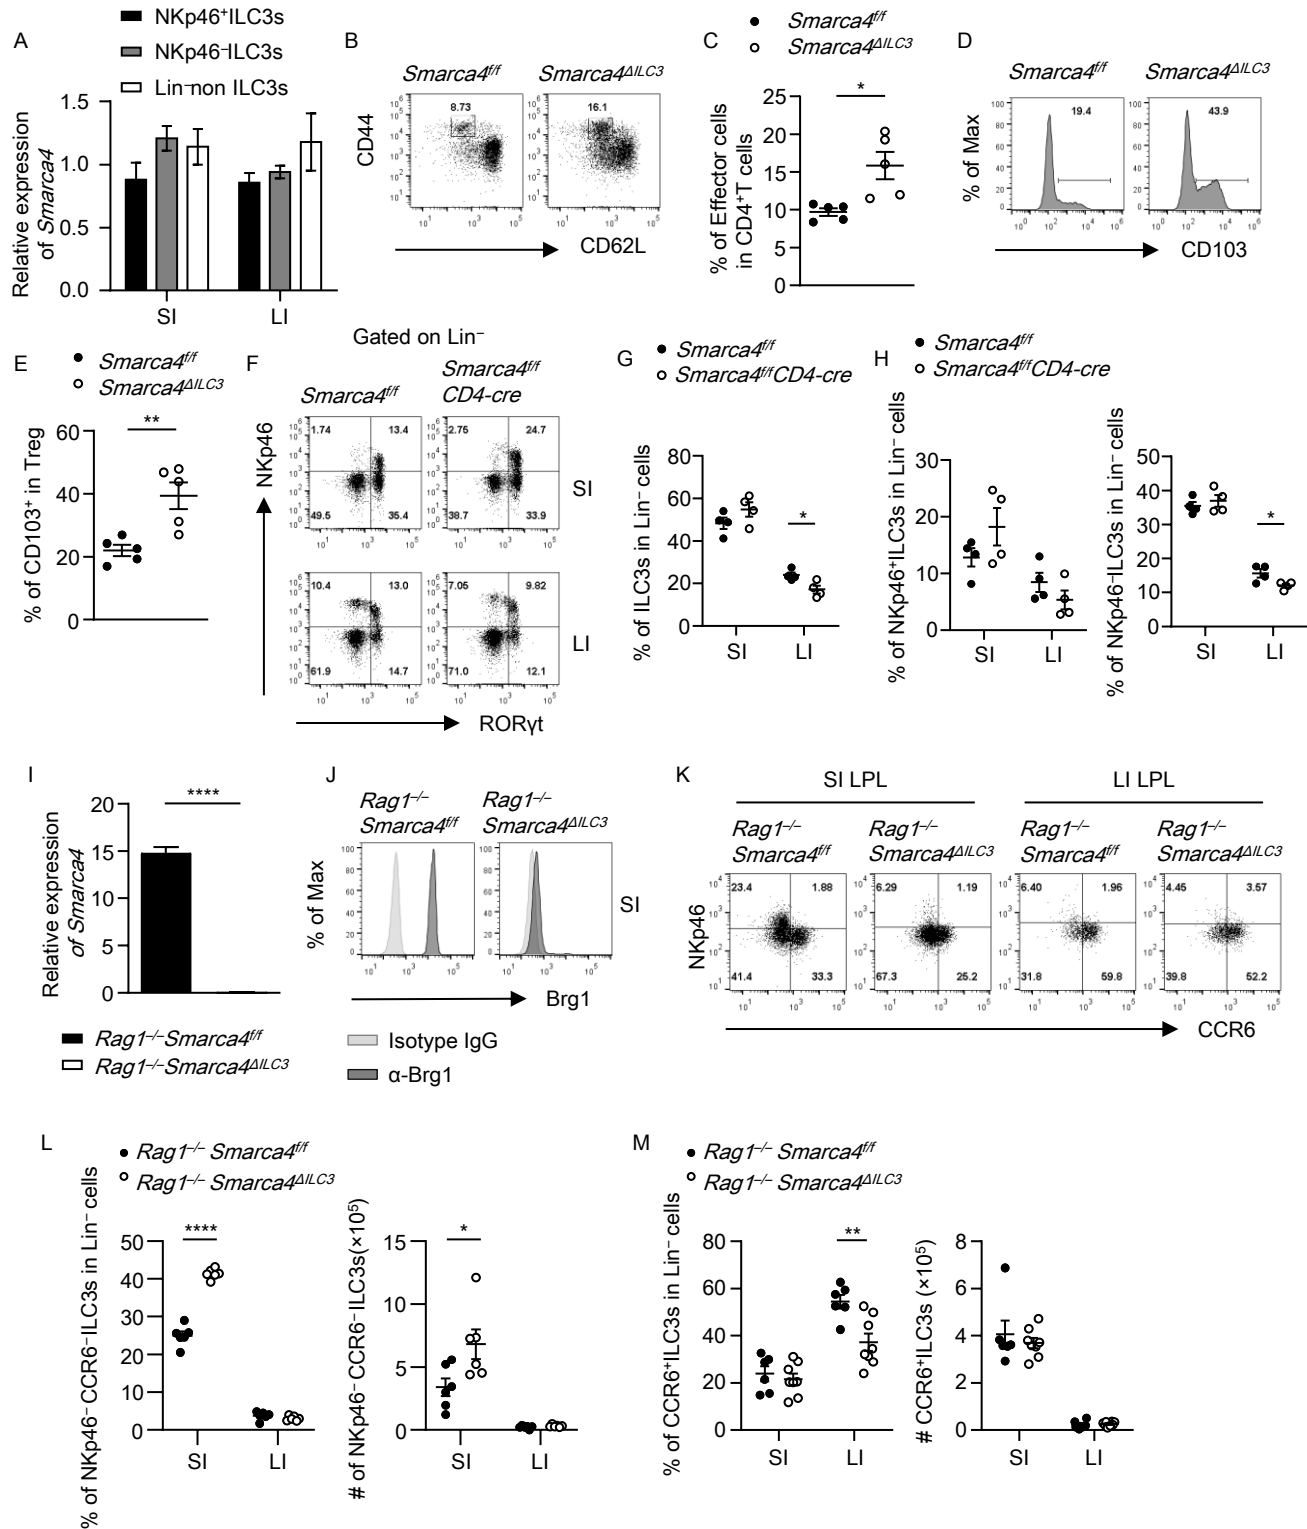

Figure S2

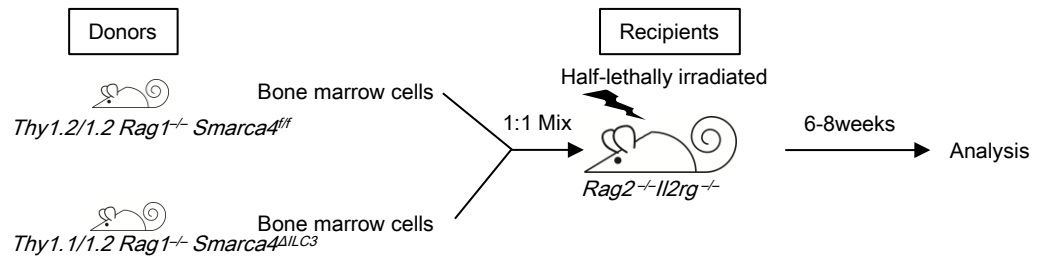

Figure S3

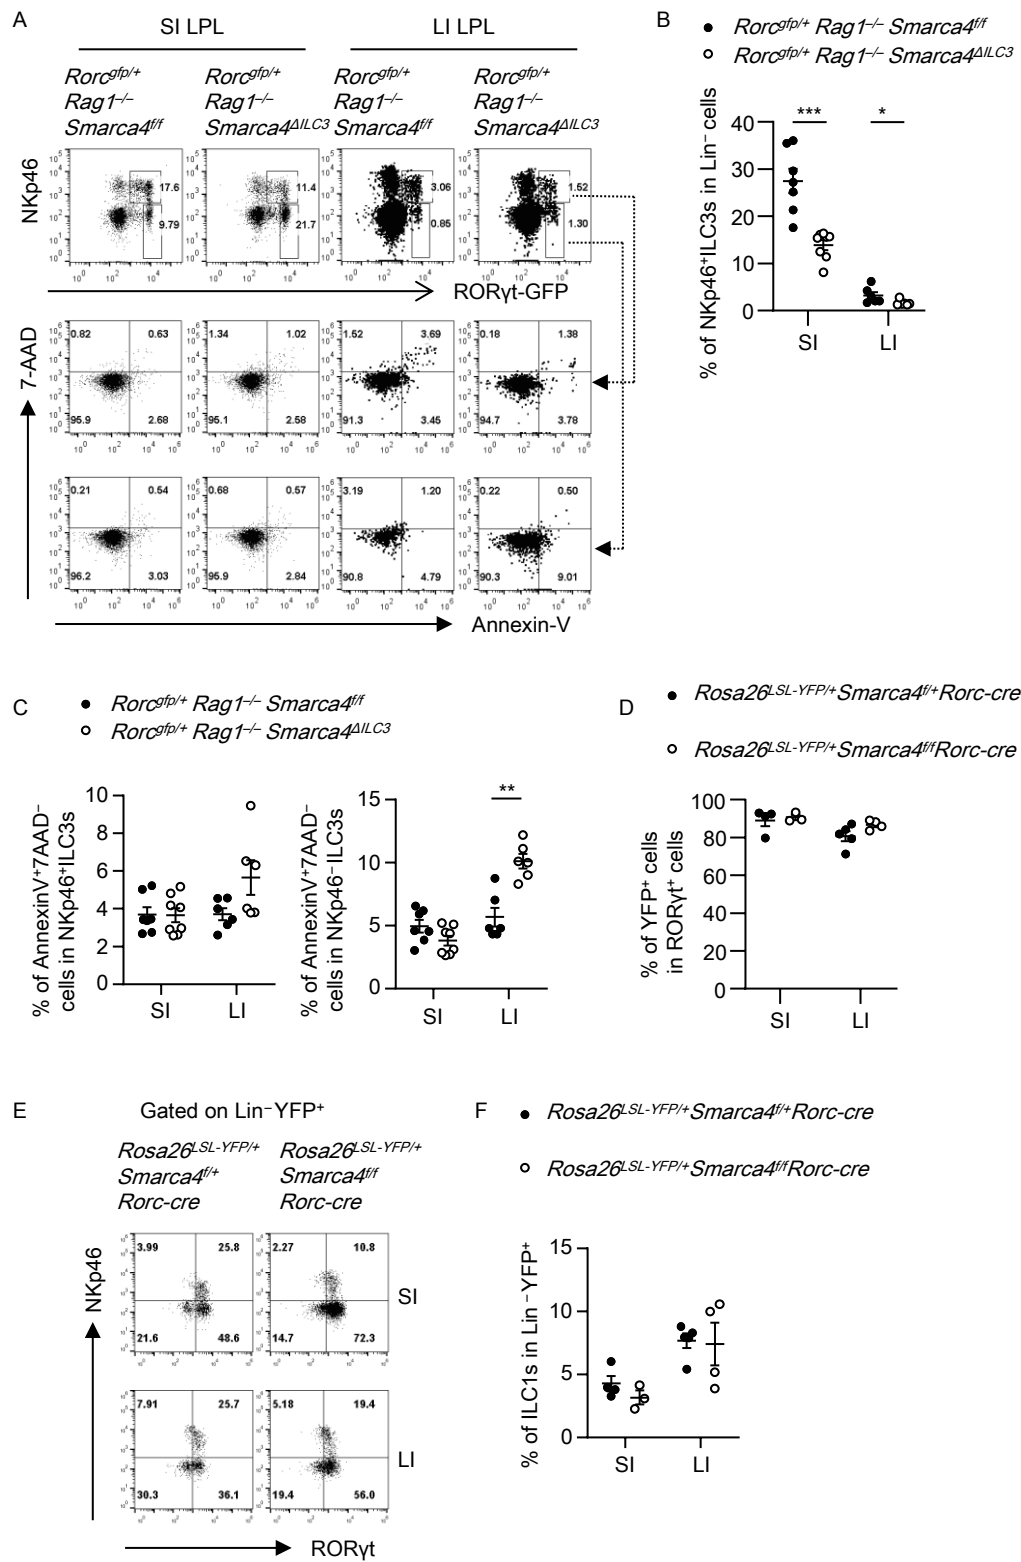

Figure S4

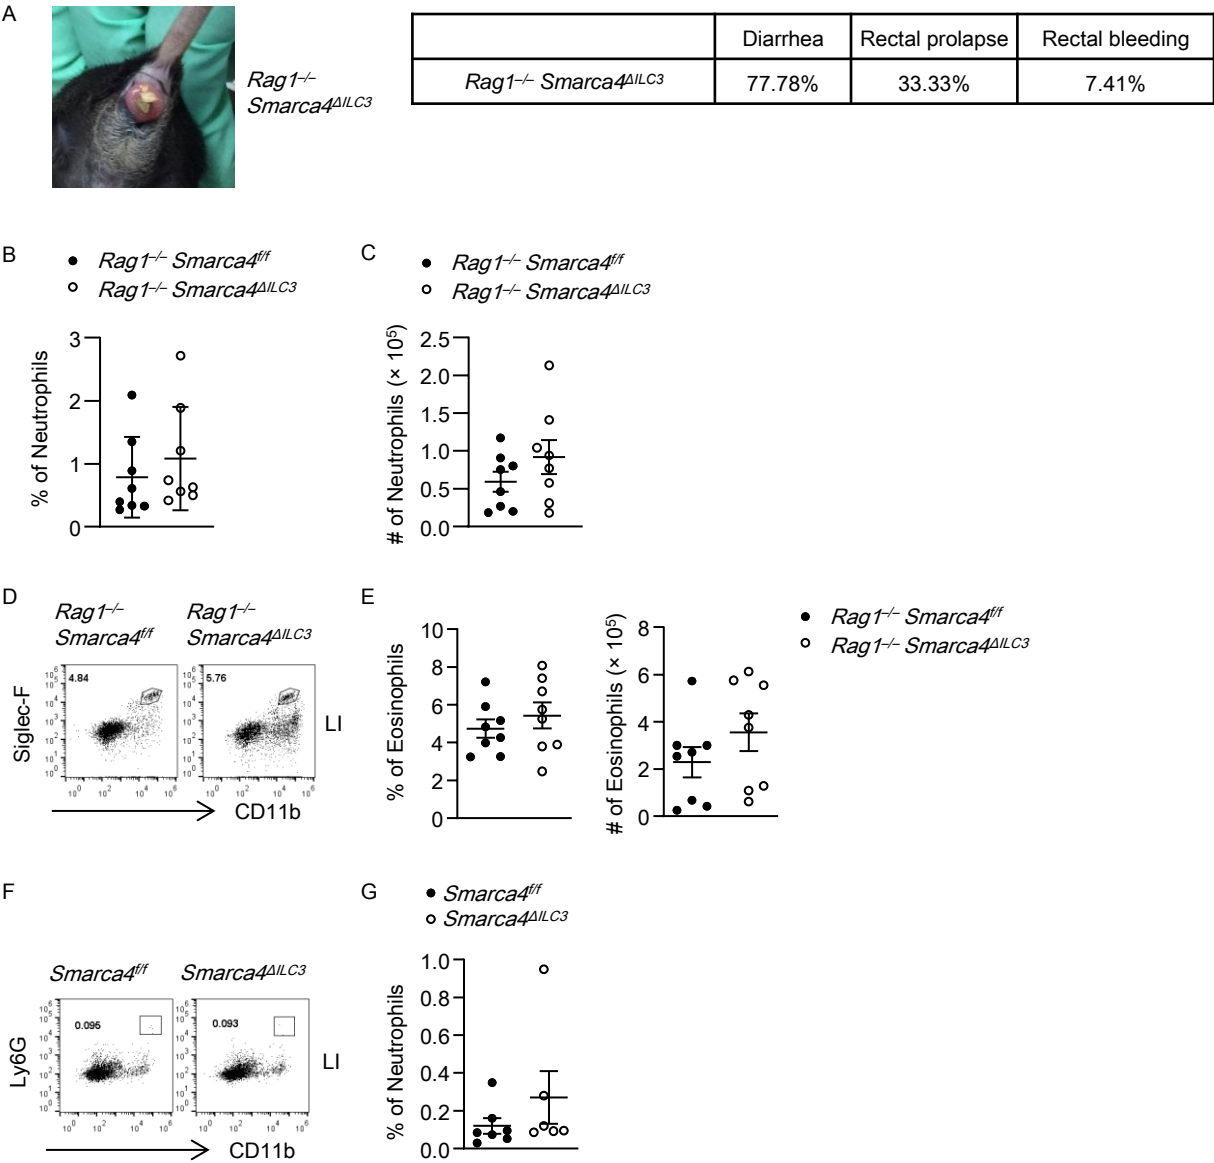

Figure S5

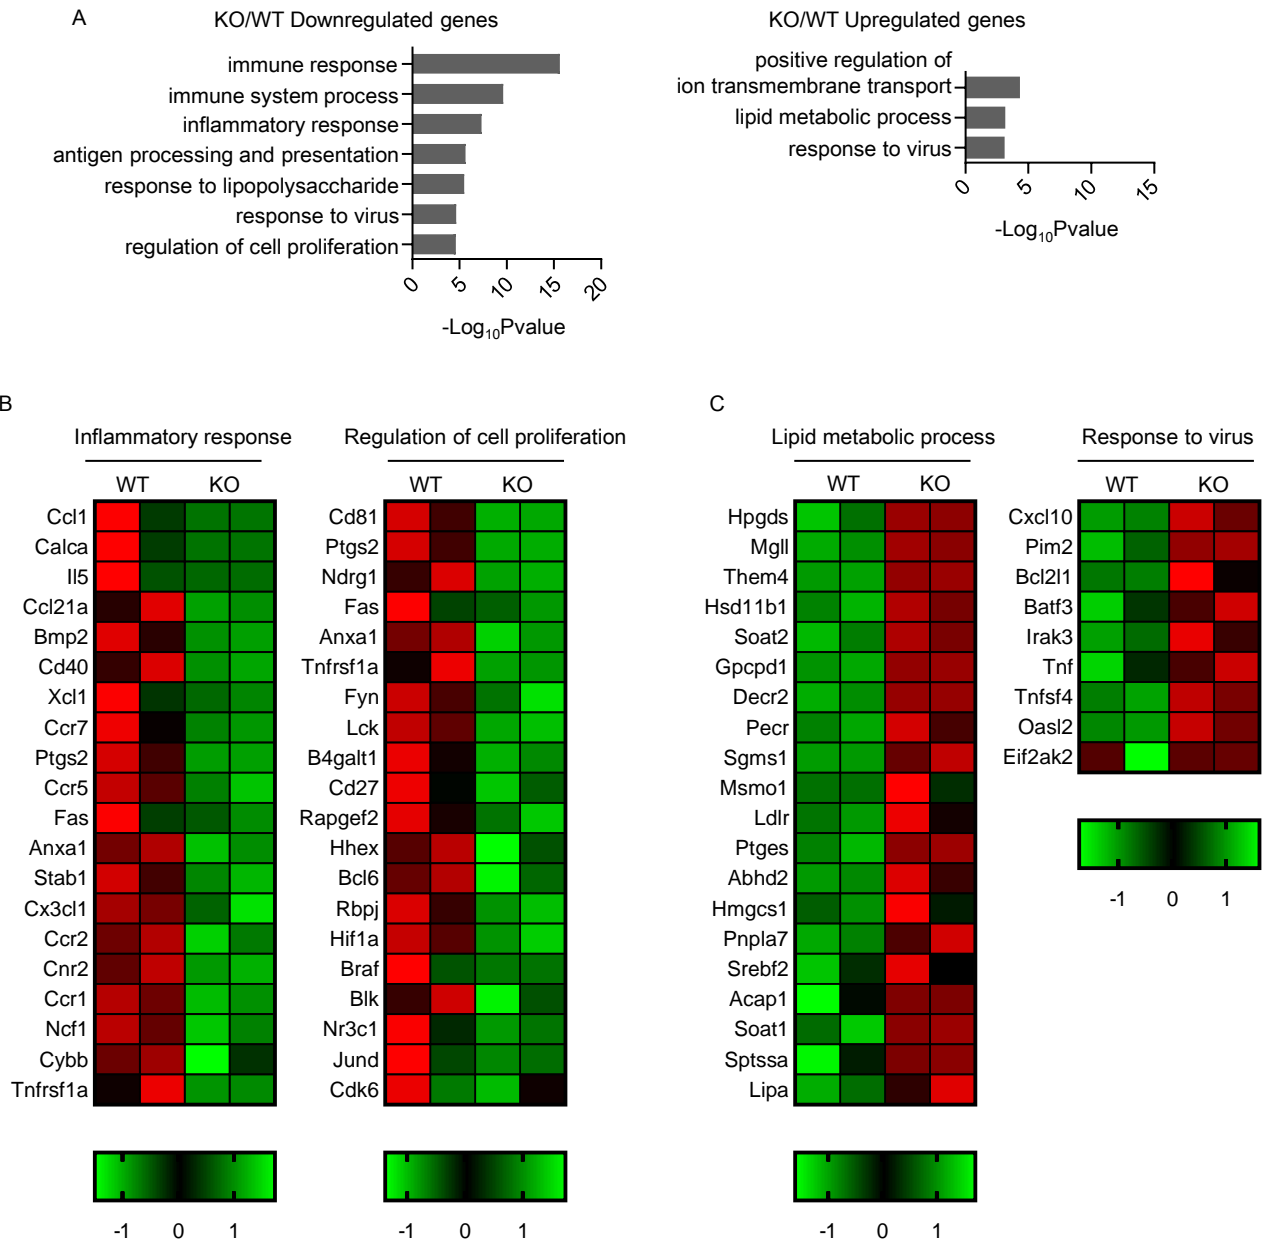

Figure S6

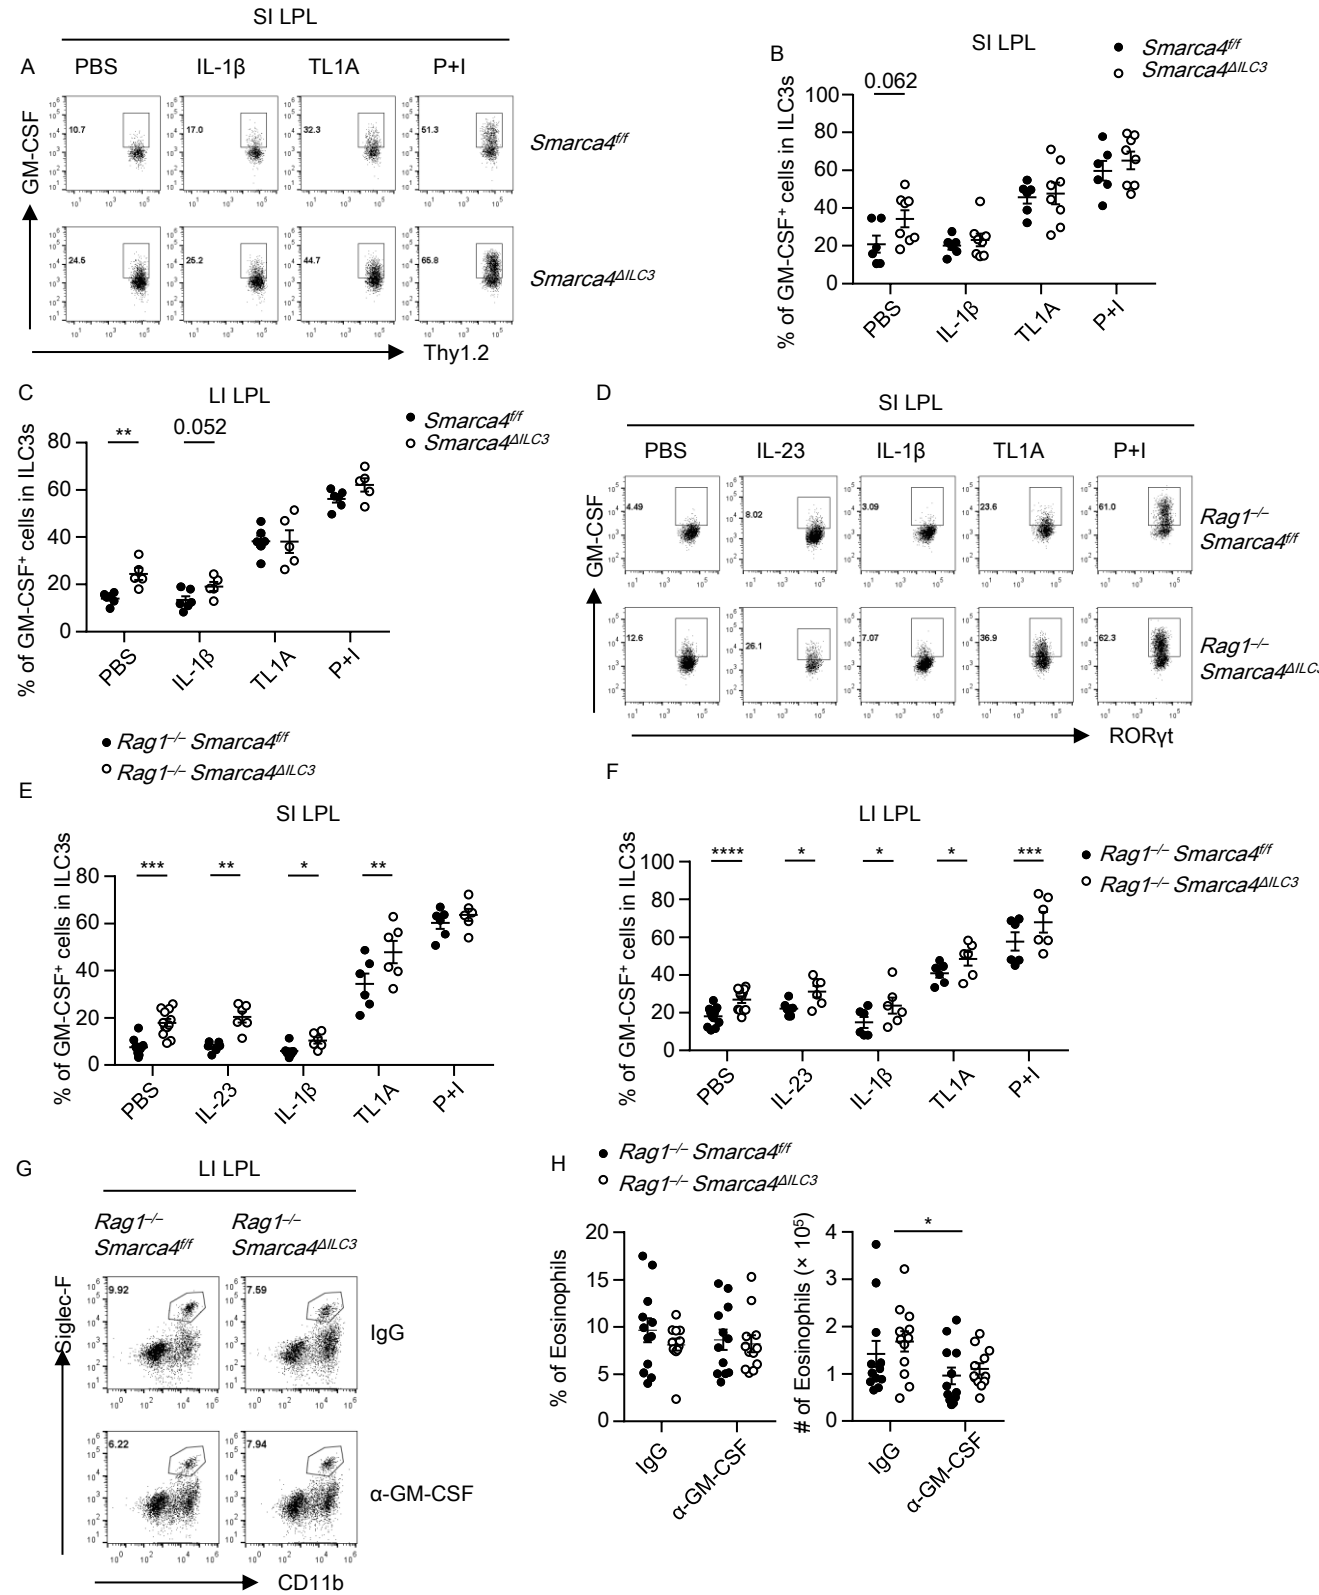

Figure S7

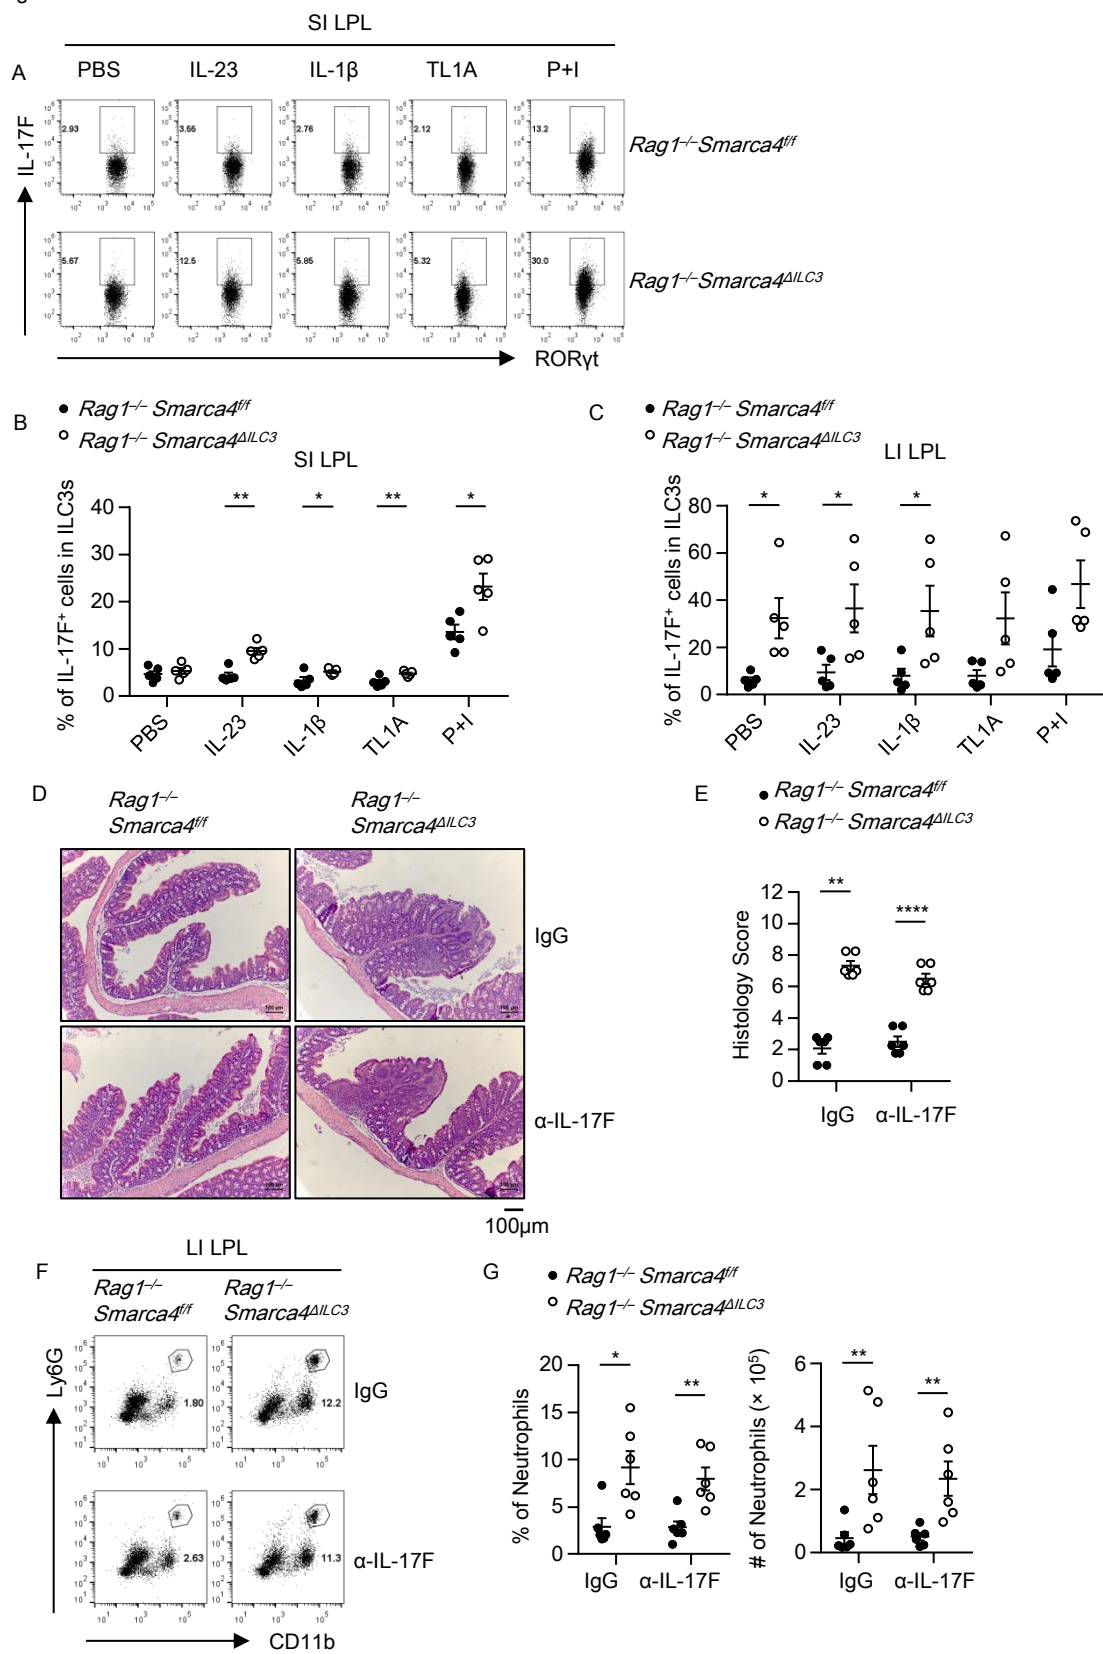

Figure S8

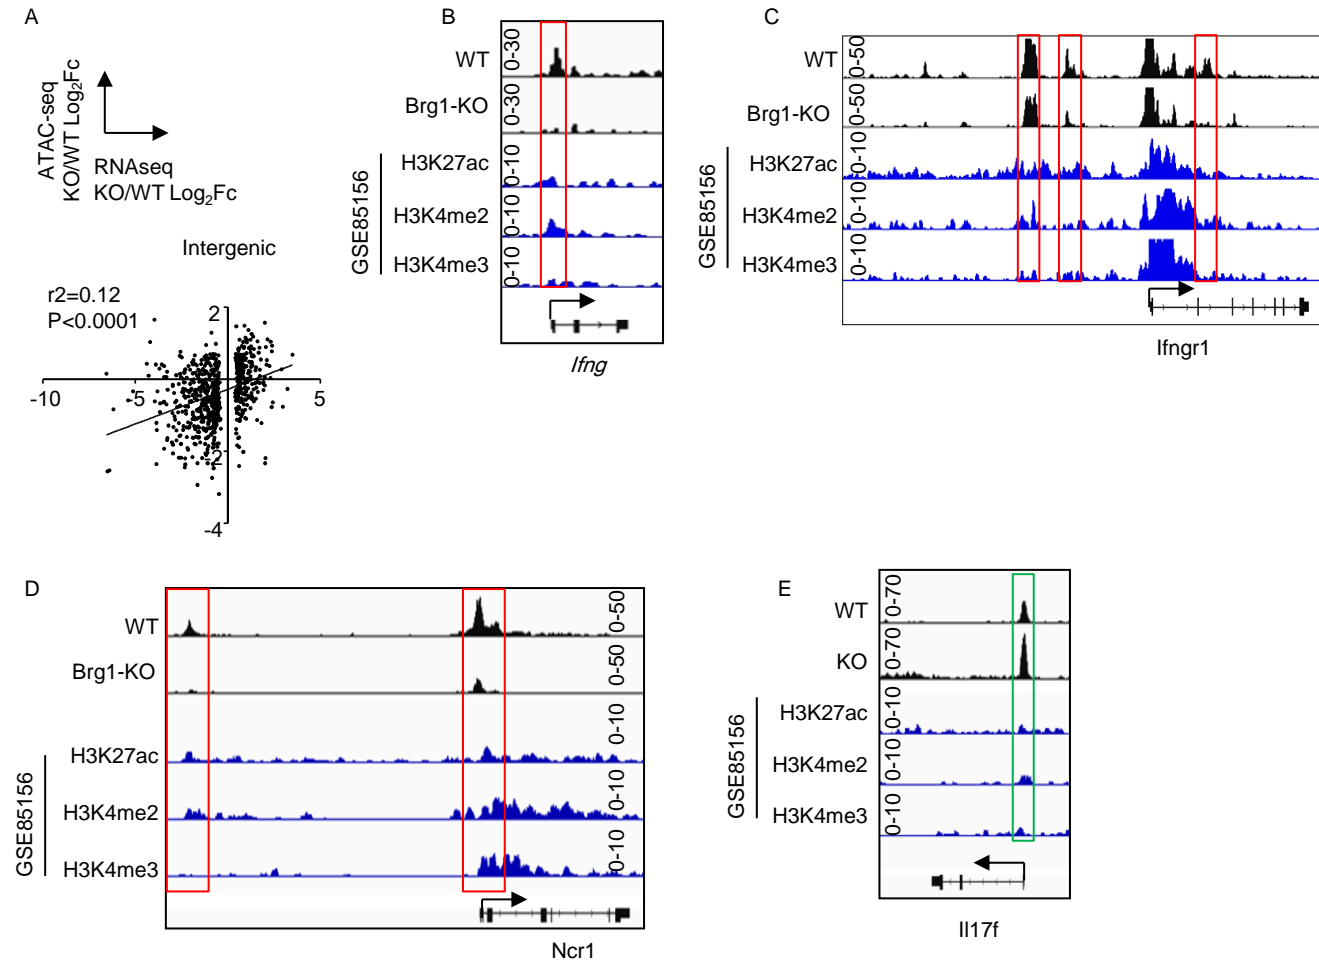

**Supplementary Figure 1 Brg1 is expressed by ILC3s and deletion of Brg1 in T cells has no effect on development of NKp46<sup>+</sup>ILC3s**

(A) Relative expression of *Smarca4* in NKp46<sup>+</sup>ILC3s (Lin<sup>-</sup>RORγt-GFP<sup>+</sup>NKp46<sup>+</sup>), NKp46<sup>-</sup>ILC3s (Lin<sup>-</sup>RORγt-GFP<sup>+</sup>NKp46<sup>-</sup>) and other ILCs (Lin<sup>-</sup>RORγt-GFP<sup>-</sup>) sorted from small (SI) and large (LI) intestinal lamina propria lymphocytes (LPLs) of the *Rorc*<sup>gfp/+</sup> mice (n=3; Representative of 2 experiments). (B-E) Splenocytes were isolated from *Smarca4*<sup>fl/fl</sup> or *Smarca4*<sup>fl/fl</sup>*Rorc-cre* (*Smarca4*<sup>ΔILC3</sup>) mice (n=5; Representative of 2 experiments). (B) Representative flow cytometry plots for effector CD4<sup>+</sup>T (CD44<sup>hi</sup>CD62L<sup>low</sup>) cells gated on CD3<sup>+</sup>CD4<sup>+</sup> cells. (C) Frequencies of effector CD4<sup>+</sup>T cells in CD3<sup>+</sup>CD4<sup>+</sup> cells. (D) Representative flow cytometry plots showing CD103 expression gated on CD3<sup>+</sup>CD4<sup>+</sup>Foxp3<sup>+</sup> regulatory T cells (Treg cells). (E) Frequencies of CD103<sup>+</sup> cells in Treg cells. (F-H) SI and LI LPLs were isolated from *Smarca4*<sup>fl/fl</sup> and *Smarca4*<sup>fl/fl</sup>*CD4-cre* mice (n=4; Representative of 2 experiments). (F) Representative flow cytometry plots for NKp46<sup>+</sup>ILC3s (Lin<sup>-</sup>RORγt<sup>+</sup>NKp46<sup>+</sup>) and NKp46<sup>-</sup>ILC3s (Lin<sup>-</sup>RORγt<sup>+</sup>NKp46<sup>-</sup>) gated on Lin<sup>-</sup> cells. (G) Frequencies of ILC3s (Lin<sup>-</sup>RORγt<sup>+</sup>) in Lin<sup>-</sup> cells. (H) Frequencies of NKp46<sup>+</sup>ILC3s and NKp46<sup>-</sup>ILC3s in Lin<sup>-</sup> cells. (I) Relative *Smarca4* mRNA expression in ILC3s (CD45<sup>low</sup>Thy1.2<sup>high</sup>) isolated from SI LPLs of *Rag1*<sup>-/-</sup>*Smarca4*<sup>fl/fl</sup> and *Rag1*<sup>-/-</sup>*Smarca4*<sup>fl/fl</sup>*Rorc-cre* (*Rag1*<sup>-/-</sup>*Smarca4*<sup>ΔILC3</sup>) mice (n=6; Representative of 2 experiments). (J) Representative flow cytometry plots showing Brg1 expression gated on ILC3s (Lin<sup>-</sup>RORγt<sup>+</sup>) from SI LPLs of *Rag1*<sup>-/-</sup>*Smarca4*<sup>fl/fl</sup> and *Rag1*<sup>-/-</sup>*Smarca4*<sup>ΔILC3</sup> mice. (K-M) SI and LI LPLs were isolated from *Rag1*<sup>-/-</sup>*Smarca4*<sup>fl/fl</sup> and *Rag1*<sup>-/-</sup>*Smarca4*<sup>ΔILC3</sup> mice (n=6-8; Representative of 3 experiments). (K) Representative flow cytometry plots for NKp46<sup>+</sup>ILC3s (Lin<sup>-</sup>

ROR $\gamma$ <sup>+</sup>NKp46<sup>+</sup>), NKp46<sup>-</sup>CCR6<sup>-</sup>ILC3s (Lin<sup>-</sup>ROR $\gamma$ <sup>+</sup>NKp46<sup>-</sup>CCR6<sup>-</sup>) and CCR6<sup>+</sup>ILC3s (Lin<sup>-</sup>ROR $\gamma$ <sup>+</sup>CCR6<sup>+</sup>) gated on ILC3s. (L) Frequencies and total numbers of NKp46<sup>-</sup>CCR6<sup>-</sup>ILC3s in Lin<sup>-</sup> cells (calculated by frequencies of NKp46<sup>-</sup>CCR6<sup>-</sup>ILC3s in ILC3s multiplying frequencies of ILC3s in Lin<sup>-</sup> cells). (M) Frequencies and total numbers of CCR6<sup>+</sup>ILC3s in Lin<sup>-</sup> cells (calculated by CCR6<sup>+</sup>ILC3s in ILC3s multiplying frequencies of ILC3s in Lin<sup>-</sup> cells). (A-M) Data are represented as means  $\pm$  SEM. Error bars show SEM. \*P<0.05, Lin<sup>-</sup>, CD3 $\epsilon$ <sup>-</sup>B220<sup>-</sup>CD11b<sup>-</sup>CD11c<sup>-</sup>.

## **Supplementary Figure 2 Schematic chart showing the construction of bone marrow chimeric mouse**

Bone marrow cells from Thy1.2/1.2*RagI*<sup>-/-</sup>*Smarca4*<sup>fl/fl</sup> and Thy1.1/1.2*RagI*<sup>-/-</sup>*Smarca4*<sup>ΔILC3</sup> mice, or alternatively from Thy1.1/1.2*RagI*<sup>-/-</sup>*Smarca4*<sup>fl/fl</sup> and Thy1.2/1.2*RagI*<sup>-/-</sup>*Smarca4*<sup>ΔILC3</sup>, or alternatively Thy1.1/1.2*RagI*<sup>-/-</sup>*Smarca4*<sup>fl/fl</sup> and Thy1.1/1.1*RagI*<sup>-/-</sup>*Smarca4*<sup>ΔILC3</sup>, were mixed at 1:1 ratio (2.5  $\times$  10<sup>6</sup> cells from each donor) and transferred to sub-lethally irradiated *Rag2*<sup>-/-</sup>*Il2rg*<sup>-/-</sup> mice. Mice were sacrificed for analyses 6-8 weeks later.

## **Supplementary Figure 3 Reduction of NKp46<sup>+</sup>ILC3s in the absence of Brg1 is not due to apoptosis or fate conversion**

(A-C) SI and LI LPLs were isolated from *RagI*<sup>-/-</sup>*Smarca4*<sup>fl/fl</sup>*Rorc*<sup>gfp/+</sup> and *RagI*<sup>-/-</sup>*Smarca4*<sup>ΔILC3</sup>*Rorc*<sup>gfp/+</sup> mice (n=6; Representative of 3 experiments). (A) Representative flow cytometry plots showing gating strategy for analysis of cell apoptosis in NKp46<sup>+</sup>ILC3s (Lin<sup>-</sup>ROR $\gamma$ <sup>+</sup>-GFP<sup>+</sup>NKp46<sup>+</sup>) and NKp46<sup>-</sup>ILC3s (Lin<sup>-</sup>ROR $\gamma$ <sup>+</sup>-GFP<sup>+</sup>NKp46<sup>-</sup>) based on Annexin-V

and 7-AAD staining. (B) Frequencies of NKp46<sup>+</sup>ILC3s in Lin<sup>-</sup> cells. (C) Frequencies of apoptotic cells (Annexin-V<sup>+</sup>7-AAD<sup>-</sup>) in NKp46<sup>+</sup>ILC3s and NKp46<sup>-</sup>ILC3s. (D-F) SI and LI LPLs were isolated from *Rosa26<sup>LSL-YFP/+</sup>Smarca4<sup>fl/+</sup>Rorc-cre* or *Rosa26<sup>LSL-YFP/+</sup>Smarca4<sup>fl/fl</sup>Rorc-cre* adult mice (n=3-5, Representative of 3 experiments). (D) Representative flow cytometry plots for FM<sup>+</sup>ILC1s (Lin<sup>-</sup>YFP<sup>+</sup>RORγt<sup>-</sup>NKp46<sup>+</sup>) gated on Lin<sup>-</sup>YFP<sup>+</sup> cells. (E) Penetrance for YFP marking of the RORγt<sup>+</sup> cells. (F) Frequencies of FM<sup>+</sup>ILC1s (Lin<sup>-</sup>YFP<sup>+</sup>RORγt<sup>-</sup>NKp46<sup>+</sup>) in Lin<sup>-</sup>YFP<sup>+</sup> cells. (A-F) Data are represented as means ± SEM. Error bars show SEM. \*\*P<0.01. FM, fate mapping; Lin<sup>-</sup>, CD3ε<sup>-</sup>B220<sup>-</sup>CD11b<sup>-</sup>CD11c<sup>-</sup>.

**Supplementary Figure 4 No signs of inflammation in the small intestine and no increased infiltration of eosinophils in the large intestine of *Rag1<sup>-/-</sup>Smarca4<sup>ALLC3</sup>* mice**

(A) Representative image showing rectal prolapse in *Rag1<sup>-/-</sup>Smarca4<sup>ALLC3</sup>* mice and incidences of diarrhea, rectal prolapse and rectal bleeding from 7 litters of *Rag1<sup>-/-</sup>Smarca4<sup>fl/fl</sup>* and *Rag1<sup>-/-</sup>Smarca4<sup>ALLC3</sup>* mice of 6-20-week-old. (B-E) 6-10-week-old *Rag1<sup>-/-</sup>Smarca4<sup>fl/fl</sup>* and *Rag1<sup>-/-</sup>Smarca4<sup>ALLC3</sup>* mice were sacrifice for analyses. (n=8; Representative of 3 experiments) Frequencies (B) and total numbers (C) of neutrophils in the SI LPLs. (D and E) Frequencies (D) and total numbers (E) of eosinophils in the LI LPLs. (F and G) LI LPLs were isolated from *Smarca4<sup>fl/fl</sup>* or *Smarca4<sup>ALLC3</sup>* mice. (n=6~7, Representative of 3 experiments) (F) Representative flow cytometry plots for neutrophils (CD11b<sup>+</sup>Ly-6G<sup>+</sup>) gated on live cells. (G) Frequencies of eosinophils in the large intestinal LPLs. (A-G) Data are represented as means ± SEM. Error bars show SEM.

**Supplementary Figure 5 Gene ontology analysis of significantly changed genes in Brg1-deficient ILC3s**

Bone marrow chimeric mice were constructed as in Figure S2. ILC3s of the same recipients from the *Rag1*<sup>-/-</sup>*Smarca4*<sup>fl/fl</sup>(WT) and *Rag1*<sup>-/-</sup>*Smarca4* <sup>$\Delta$ ILC3</sup>(KO) donor origin were sorted from the small intestinal LPLs for RNA-seq analysis. (A) Gene ontology enrichment analyses were performed on downregulated genes and upregulated genes of more than 2<sup>0.5</sup> fold in Brg1-deficient ILC3s, and representative enriched biological processes were shown. (B and C) Representative list of downregulated genes (B) or upregulated genes (C) categorized by gene ontology in Brg1-deficient ILC3s were shown with Z-normalized heatmap.

**Supplementary Figure 6 Brg1 suppresses GM-CSF expression in ILC3s in a cell-intrinsic manner**

(A-C) SI and LI LPLs isolated from *Smarca4*<sup>fl/fl</sup> or *Smarca4* <sup>$\Delta$ ILC3</sup> mice with PBS, IL-1 $\beta$  (10ng/ml) or TL1A (10ng/ml) overnight or phorbol 12-myristate 13-acetate (PMA) plus ionomycin (P+I) for 3 hours prior to analyses. (A) Representative flow cytometry plots for GM-CSF expression gated on ILC3s (Lin<sup>-</sup>CD45<sup>low</sup>Thy1.2<sup>high</sup>) in SI LPLs. (B and C) Frequencies of GM-CSF<sup>+</sup> cells in ILC3s from SI (B) and LI (C) LPLs. (n=5~8, Representative of 5 experiments). (D-F) Bone marrow chimeric mice were constructed as in Figure S2. SI and LI LPLs from recipient mice were isolated for analyses 6 weeks later. LPLs were stimulated with PBS, IL-23 (10ng/ml), IL-1 $\beta$  (10ng/ml) or TL1A (10ng/ml) overnight or PMA plus ionomycin for 3 hours prior to analyses (n=6~12, Representative of 4 experiments).

(D) Representative flow cytometry plots showing expression of GM-CSF gated on ILC3s from the small intestine of indicated hosts identified by the congenic marker Thy1.1. (E and F) Frequencies of GM-CSF<sup>+</sup> cells in ILC3s from the SI (E) and LI (F) LPLs. (G and H) 4-6-week-old *Rag1*<sup>-/-</sup>*Smarca4*<sup>fl/fl</sup> and *Rag1*<sup>-/-</sup>*Smarca4*<sup>ΔILC3</sup> mice were treated with 250ug of IgG or α-GM-CSF per mouse every 3 days for 14 days before analyses. (n=12~14, Representative of 4 experiments) (G) Representative flow cytometry plots for eosinophils (CD11b<sup>+</sup>Siglec-F<sup>+</sup>) gated on live cells in LI LPLs. (H) Frequencies and total numbers of eosinophils in the LI LPLs. (A-H) Data are represented as means ± SEM. Error bars show SEM. \*P<0.05, \*\*P<0.01, \*\*\*P<0.001, \*\*\*\*P<0.0001. Lin<sup>-</sup>, CD3ε<sup>-</sup>B220<sup>-</sup>CD11b<sup>-</sup>CD11c<sup>-</sup>.

**Supplementary Figure 7 Enhanced IL-17F production by brg1-deficient ILC3s is not a key pathogenic factor in *Rag1*<sup>-/-</sup>*Smarca4*<sup>ΔILC3</sup> mice**

(A-C) SI and LI LPLs isolated from *Rag1*<sup>-/-</sup>*Smarca4*<sup>fl/fl</sup> and *Rag1*<sup>-/-</sup>*Smarca4*<sup>ΔILC3</sup> mice were stimulated with PBS, IL-23 (10ng/ml), IL-1β (10ng/ml) or TL1A (10ng/ml) overnight or PMA plus ionomycin for 3 hours prior to analyses. (n=5; Representative of 2 experiments) (A) Representative flow cytometry plots for IL-17F expression gated on ILC3s (Lin<sup>-</sup>CD45<sup>low</sup>Thy1.2<sup>high</sup>RORγt<sup>+</sup>) in SI LPLs. (B and C) Frequencies of IL-17F<sup>+</sup> cells in ILC3s (CD45<sup>low</sup>Thy1.2<sup>high</sup>RORγt<sup>+</sup>) from SI (B) and LI (C) LPLs. (D-G) 4-6-week-old *Rag1*<sup>-/-</sup>*Smarca4*<sup>fl/fl</sup> and *Rag1*<sup>-/-</sup>*Smarca4*<sup>ΔILC3</sup> mice were treated with 250ug of IgG or α-IL-17F per mouse every 3 days for 14 days before analyses. (n=6; Representative of 2 experiments) (D) Representative H&E staining of colon sections (magnification 10×). Scale bar is 100μm. (E) Histological scores of colon sections. (F) Representative flow cytometry plots for neutrophils

(CD11b<sup>+</sup>Ly6G<sup>+</sup>) gated on live cells in LI LPLs. (G) Frequencies and total numbers of lamina propria infiltrating neutrophils. (A-G) Data are represented as means  $\pm$  SEM. Error bars show SEM. \*P<0.05, \*\*P<0.01, \*\*\*P<0.001, \*\*\*\*P<0.0001. Lin<sup>-</sup>, CD3 $\epsilon$ <sup>-</sup>B220<sup>-</sup>CD11b<sup>-</sup>CD11c<sup>-</sup>; Data are representative of 2 independent experiments.

### **Supplementary Figure 8 Brg1 regulates the chromatin accessibility of target genes in ILC3s**

ILC3s (Thy1.2<sup>high</sup>CD45<sup>low</sup> cells) were purified from the small intestine of *Rag1*<sup>-/-</sup>*Smarca4*<sup>ff</sup> or *Rag1*<sup>-/-</sup>*Smarca4*<sup>ILC3</sup> mice and ATAC-seq was performed and analyzed. (A) Correlation analysis was performed on Log2fold of gene expression (Brg1-deficient over wild-type ILC3s) and the average Log2fold in accessibility of OCRs distributed at intergenic regions. (B-E) Integrated visualization of ATAC-seq peaks in WT or Brg1-deficient ILC3s, together with published ChIP-seq data of small intestinal ILC3s (GSE85156). Red boxes and green boxes highlight representative WT-ILC3-OCRs and Brg1-KO-ILC3-OCRs respectively. Definition of OCRs was described in methods. R<sup>2</sup> indicate correlation coefficient.

### **Supplementary Data 1**

List of genes used for gene ontology analyses in Figure S5.

### **Supplementary Data 2**

WT-ILC3-OCRs and Brg1-KO-ILC3-OCRs.

Biological triplicates of 50000 ILC3s (Thy1.2<sup>high</sup>CD45<sup>low</sup> cells) sorted by flow cytometry from the small intestine of 7-9 week old *Rag1*<sup>-/-</sup>*Smarca4*<sup>ff</sup> or *Rag1*<sup>-/-</sup>*Smarca4*<sup>ILC3</sup> mice were

subjected to ATAC-seq analysis. Lists of WT-ILC3-OCRs and Brg1-KO-ILC3-OCRs were identified using DEseq2 analysis and shown (see methods). Locations of peaks were shown. RRB\_KO1\_lg, RRB\_KO2\_lg and RRB\_KO3\_lg were the  $\text{Log}_{10}\text{FPKM}$  value of counts from Brg1-KO-ILC3s, and RRB\_WT1\_lg, RRB\_KO2\_lg and RRB\_KO3\_lg were the  $\text{Log}_{10}\text{FPKM}$  value of counts from WT-ILC3s.  $\text{Log}_2\text{FoldChange}$  indicate relative ratio of counts from Brg1-KO-ILC3s over WT-ILC3s.

### **Supplementary Data 3**

Enriched motifs in WT or Brg1-KO-ILC3-OCRs.

Motif enrichment analysis on WT-ILC3-OCRs and Brg1-KO-ILC3-OCRs were analyzed using Homer2. Representative enriched motifs were listed with cut off p value of  $1 \times 10^{-6}$ .

**Supplementary Table 1. List of antibodies used for flow cytometry**

Clone numbers and manufactures of the antibodies used for flow cytometry were shown.

| Antibody       | Clone           | Company                  |
|----------------|-----------------|--------------------------|
| CD3e           | 145-2C11        | Thermo Fisher Scientific |
| B220           | RA3-6B2         | Thermo Fisher Scientific |
| CD11b          | M1/70           | Thermo Fisher Scientific |
| CD11c          | N418            | Thermo Fisher Scientific |
| CD4            | RM4-5           | Thermo Fisher Scientific |
| Foxp3          | FJK-16s         | Thermo Fisher Scientific |
| CD62L          | MEL-14          | Thermo Fisher Scientific |
| CD44           | IM7             | Thermo Fisher Scientific |
| Ly-6G          | 1A8             | BD Pharmingen            |
| Siglec-F       | E50-2440        | BD Pharmingen            |
| NKp46          | 29A1.4          | Thermo Fisher Scientific |
| IL-17F         | O79-289         | BD Pharmingen            |
| GM-CSF         | MP1-22E9        | ebioscience              |
| CD103          | 2E7             | Thermo Fisher Scientific |
| ROR $\gamma$ t | B2D             | Thermo Fisher Scientific |
| Thy-1.2        | 30-H12          | Thermo Fisher Scientific |
| Thy-1.1        | HIS51           | Thermo Fisher Scientific |
| CD45           | 30-F11          | Thermo Fisher Scientific |
| CCR6           | 140706          | BD biosciences           |
| T-bet          | eBio4B10 (4B10) | Thermo Fisher Scientific |
| Ki-67          | SolA15          | Thermo Fisher Scientific |
| CD16/CD32      | 93              | Thermo Fisher Scientific |

## Supplementary Table 2. List of primers used for quantatative PCR

Sequences for primers used for real-time RT-PCR or ChIP-Q-PCR experiments were shown.

| Gene or Locus         | Forward Primer            | Reverse Primer            |
|-----------------------|---------------------------|---------------------------|
| <i>Smarca4</i>        | CAAAGACAAGCATATCCTAGCCA   | CACGTAGTGTGTGTTAAGGACC    |
| <i>Dll1</i>           | GGGGACAGAGGGGAGAAGAT      | AGCCTTCCTGGCAGTTACAC      |
| <i>Hes1</i>           | CAACACGACACCGGACAAAC      | GGAATGCCGGGAGCTATCTT      |
| <i>Rbpj</i>           | TCCATCGGCGGGGAAGTT        | ACTGTTTGATCCCCTCGTTCTT    |
| <i>Notch2</i>         | CAGCACTGTGACAGCCCTTA      | TATTCCGCTCACAGGTGCTC      |
| <i>Tbx21</i>          | AAGTTCAACCAGCACCAGACA     | GGTGGACATATAAGCGGTTCC     |
| <i>Csf2</i>           | TCAAGAAGCTAACATGTGTGCAG   | ACAGTCCGTTTCCGGAGTTG      |
| <i>Il17f</i>          | CCCAGGAAGACATACTTAGAAGAAA | CAACAGTAGCAAAGACTTGACCA   |
| <i>Tbx21 promoter</i> | CACACAGACACCGGTTGGTA      | TGGGGTAGGCTGGGGAAATA      |
| <i>Tbx21.1</i>        | ATAGGCAGGTGGGTCTGACA      | AACAAGGGGGCTTCCAACAA      |
| <i>Csf2 promoter</i>  | TGTCATTCTCACTGCTCCCAAG    | GGAGACCATTCTGGGCAAACT     |
| <i>Csf2.1</i>         | CCTAACCTGGCAGAAGAGCC      | TGTCCAGAGAGATGCTCCCA      |
| <i>Csf2 CNSc</i>      | GGCTTCAGCTCCCCACTTCT      | GGTTTCTAGCTTATATCCCCAGACA |
